# Supplementary material
Source: PubMed Central journal article supplement (PMC10049999)
Supplement: 41433_2023_2428_MOESM1_ESM.pdf [file 41433_2023_2428_MOESM1_ESM.pdf]

| Patient | Melanoma | Initial margin (mm) | Stages  | Final margin (mm) | Breslow depth | Outcomes |
|---------|----------|---------------------|---------|-------------------|---------------|----------|
| 1       | LMM      | 3                   |         |                   | 6             |          |
| 2       | LMM      | 5                   | E3, E3  | 11                | 8             |          |
| 3       | LMM      | 5                   |         |                   | 0.9           |          |
| 4       | LMM      | 5                   |         |                   | 6             | R + RIP  |
| 5       | LMM      | 3                   |         |                   | 16            |          |
| 6       | NM       | 3                   |         |                   | 26            | R        |
| 7       | Mis (LM) | 3                   | E3,E3   | 9                 | -             |          |
| 8       | NM       | 5                   |         |                   | 1.8           |          |
| 9       | AM       | 5                   | E2      | 7                 | 0.5           |          |
| 10      | NM       | 5                   |         |                   | 2.4           | RIP      |
| 11      | LMM      | 2                   | E 5     | 7                 | 1.2           |          |
| 12      | LMM      | 5                   | E 0.7   | 5.7               | 1.8           | R        |
| 13      | LMM      | 4                   |         |                   | 2.45          |          |
| 14      | DM       | 5                   | E 5, E5 | 15                | 11.7          | R        |
| 15      | Mis (LM) | 3                   | E 2     | 5                 | -             |          |
| 16      | AM       | 5                   |         |                   | 4.9           | R        |
| 17      | Mis (LM) | 2                   |         |                   | -             | R        |
| 18      | Mis (LM) | 5                   |         |                   | -             | R        |
| 19      | Mis (LM) | 4                   | E3,E3   | 10                | -             |          |
| 20      | Mis (LM) | 3                   | E3,E3   | 9                 | -             |          |
| 21      | NM       | 10                  |         |                   | 4.7           | R        |
| 22      | Mis (LM) | 3                   |         |                   | -             |          |
